# Supplementary material
Source: MDPI journal article supplement (https://www.mdpi.com/2227-9717/7/7/408)
Supplement: s1 [file s1]

## Supplementary Materials

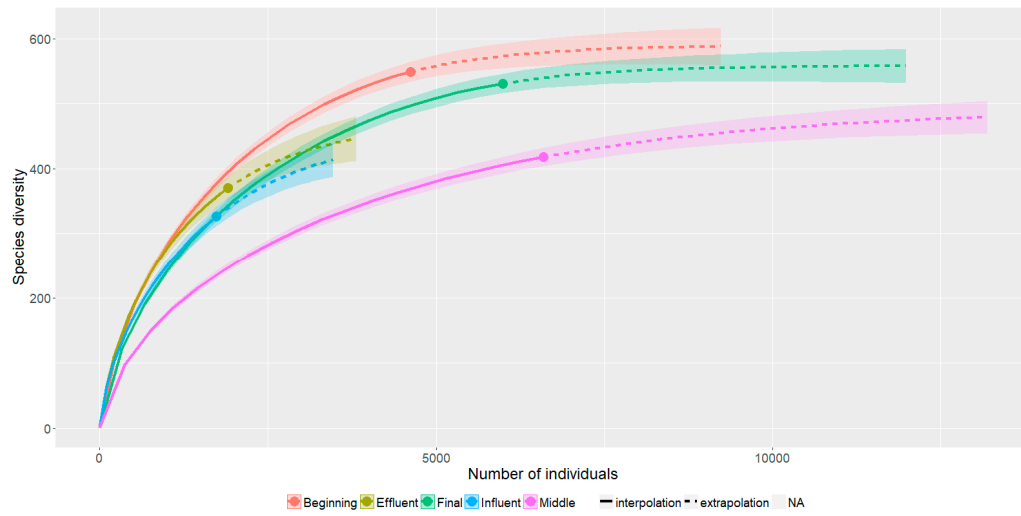

**Figure S1.** Rarefaction curves for 16S rRNA gene sequences derived from the biodigester. OTUs are retrieved at 97% of similarity

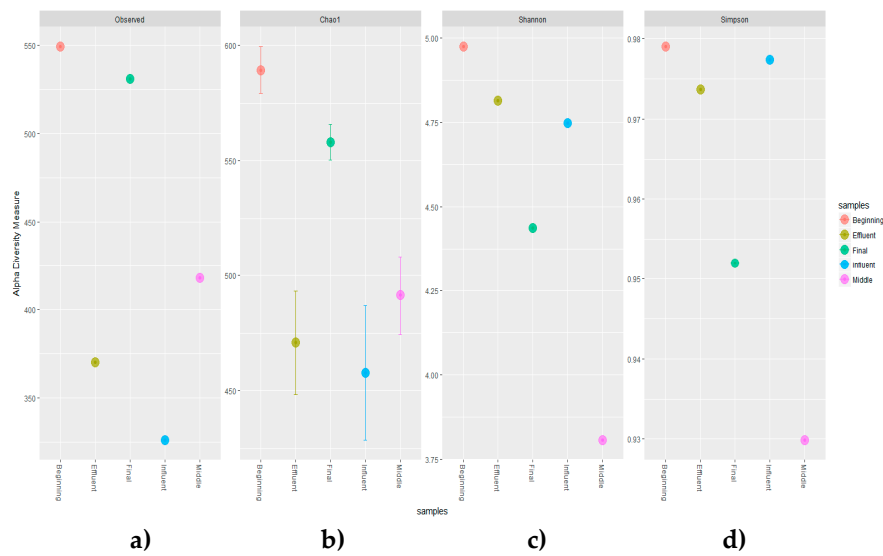

**FIGURE S2.** Comparison of diversity between the different sampling sites of the biodigester using different measures of alpha diversity. a) Observed OTUs, b) Chao1 index, c) Shannon index and d) Simpson index

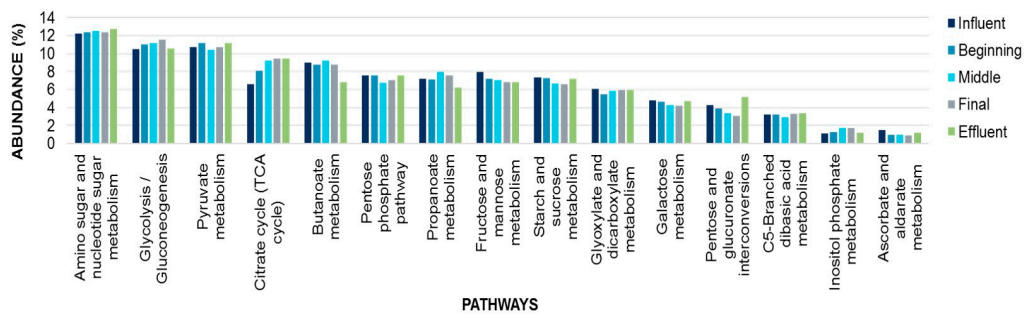

**FIGURE S3.** Prediction of functional profiling by abundances of KEGG pathways in level-3 (Amino acid metabolism) by using PICRUSt

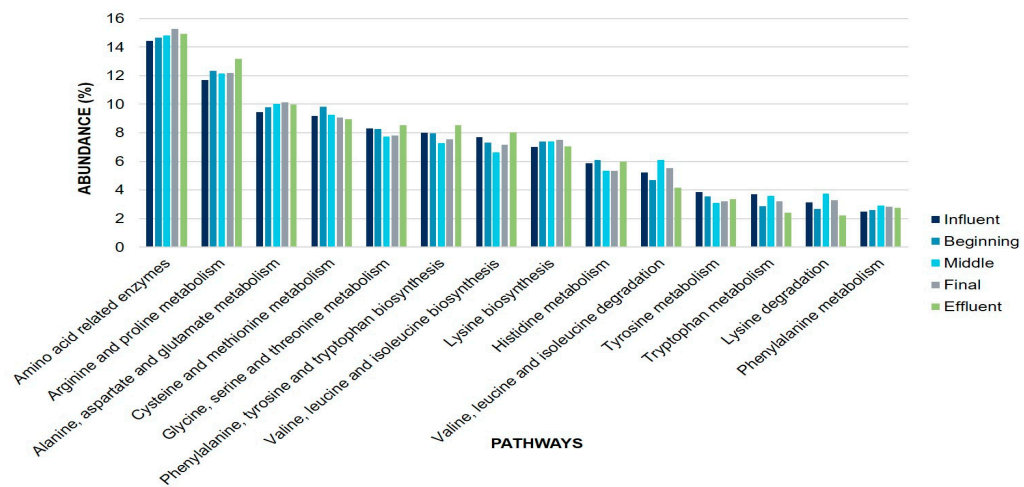

**FIGURE S4.** Prediction of functional profiling by abundances of KEGG pathways in level-3 (Amino acid metabolism) by using PICRUSt

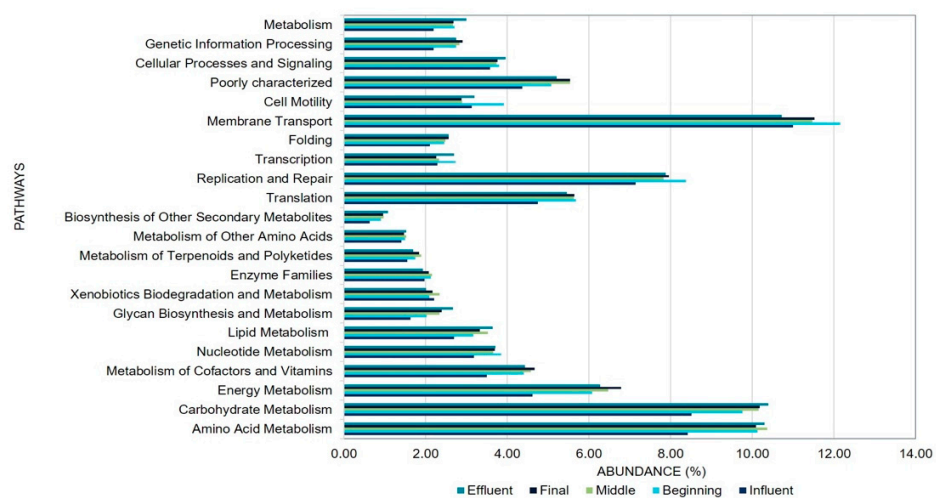

**FIGURE S5.** Abundances of KEGG pathways in level-2 of the functional prediction by PICRUSt.
